# Supplementary material
Source: HighWire-hosted journal article supplement (https://bmjopen.bmj.com/content/11/10/e046050)
Supplement: inline-supplementary-material-2 [file inline-supplementary-material-2.pdf]

## Additional file 2. Logic Grid and preliminary search strategy for PubMed

*Barriers and Facilitators of Diabetes Management by Continuous Glucose Monitoring Systems among Adults with Type 2 Diabetes: A Qualitative Systematic Review*

## Limited to Humans and English

## Only terms to be used in the Title &amp; Abstract

| Population<br>(Adults with type 2 diabetes)                                                                                                                                                                                                                                                                                                                                                                                                                                                                                                                                                                                                                                                                                                                                                                                                                                                                                                                                                                                                                                                        | Intervention<br>(All type of continuous glucose monitoring)                                                                                                                                                                                                                                                                                                                                                                                                                                                                                                                                                                                              | Study                                                                                                                                                                                                                                                                                                                                                                                                                                                                                                                                                                                                                                                                                                                                                                                                                                                                                                                                                                                                                                                                                                                                                                                                                                                                                                                                                                                                                                                                                                                                                                                                                                                                                                                                                                                                 |
|----------------------------------------------------------------------------------------------------------------------------------------------------------------------------------------------------------------------------------------------------------------------------------------------------------------------------------------------------------------------------------------------------------------------------------------------------------------------------------------------------------------------------------------------------------------------------------------------------------------------------------------------------------------------------------------------------------------------------------------------------------------------------------------------------------------------------------------------------------------------------------------------------------------------------------------------------------------------------------------------------------------------------------------------------------------------------------------------------|----------------------------------------------------------------------------------------------------------------------------------------------------------------------------------------------------------------------------------------------------------------------------------------------------------------------------------------------------------------------------------------------------------------------------------------------------------------------------------------------------------------------------------------------------------------------------------------------------------------------------------------------------------|-------------------------------------------------------------------------------------------------------------------------------------------------------------------------------------------------------------------------------------------------------------------------------------------------------------------------------------------------------------------------------------------------------------------------------------------------------------------------------------------------------------------------------------------------------------------------------------------------------------------------------------------------------------------------------------------------------------------------------------------------------------------------------------------------------------------------------------------------------------------------------------------------------------------------------------------------------------------------------------------------------------------------------------------------------------------------------------------------------------------------------------------------------------------------------------------------------------------------------------------------------------------------------------------------------------------------------------------------------------------------------------------------------------------------------------------------------------------------------------------------------------------------------------------------------------------------------------------------------------------------------------------------------------------------------------------------------------------------------------------------------------------------------------------------------|
| <b>"Diabetes Mellitus, Type 2"[Mesh]</b><br>Diabetes Mellitus, Noninsulin-Dependent<br>Diabetes Mellitus, Ketosis-Resistant<br>Diabetes Mellitus, Ketosis Resistant<br>Ketosis-Resistant Diabetes Mellitus<br>Diabetes Mellitus, Non Insulin Dependent<br>Diabetes Mellitus, Non-Insulin-Dependent<br>Non-Insulin-Dependent Diabetes Mellitus<br>Diabetes Mellitus, Stable<br>Stable Diabetes Mellitus<br>Diabetes Mellitus, Type II<br>NIDDM<br>Diabetes Mellitus, Noninsulin Dependent<br>Diabetes Mellitus, Maturity-Onset<br>Diabetes Mellitus, Maturity Onset<br>Maturity-Onset Diabetes Mellitus<br>Maturity Onset Diabetes Mellitus<br>MODY<br>Diabetes Mellitus, Slow-Onset<br>Diabetes Mellitus, Slow Onset<br>Slow-Onset Diabetes Mellitus<br>Type 2 Diabetes Mellitus<br>Noninsulin-Dependent Diabetes Mellitus<br>Noninsulin Dependent Diabetes Mellitus<br>Maturity-Onset Diabetes<br>Diabetes, Maturity-Onset<br>Maturity Onset Diabetes<br>Type 2 Diabetes<br>Diabetes, Type 2<br>Diabetes Mellitus, Adult-Onset<br>Adult-Onset Diabetes Mellitus<br>Diabetes Mellitus, Adult Onset | <b>Continuous glucose monitoring system*</b><br>continuous glucose monitor*<br>continuous glucose sens*<br>continuous glucose device*<br>continuous blood sugar monitor*<br>continuous blood sugar sens*<br>continuous blood device*<br>continuous subcutaneous glucose monitor*<br>continuous subcutaneous glucose sens*<br>CGM*<br>real-time CGM*<br>real time CGM *<br>rt-CGM*<br>rt CGM*<br>fash glucose monitor*<br>FGM*<br>sensor-augmented insulin pump<br>sensor augmented insulin pump<br>SAP<br><br>iPro*<br>FreeStyle Libre*<br>HiBell*<br>Dexcom*<br>MiniMed*<br>Medtronic*<br>Guardian Connect CGM*<br>Senseonics Eversense*<br>GlucoTrack* | (semi-structured[TIAB] OR semistructured[TIAB] OR unstructured[TIAB] OR informal[TIAB] OR in-depth[TIAB] OR indepth[TIAB] OR face-to-face[TIAB] OR structured[TIAB] OR guide[TIAB] OR guides[TIAB]) AND (interview*[TIAB] OR discussion*[TIAB] OR questionnaire*[TIAB] OR focus group*[TIAB] OR qualitative[TIAB] OR ethnograph*[TIAB] OR fieldwork[TIAB] OR field work[TIAB] OR key informant[TIAB] OR "interviews as topic"[Mesh] OR "focus groups"[Mesh] OR "narration"[Mesh] OR "qualitative research"[Mesh] OR "personal narratives as topic"[Mesh] OR theme[TIAB] OR thematic[TIAB] OR ethnological research[TIAB] OR phenomenol*[TIAB] OR grounded theory[TIAB] OR grounded study[TIAB] OR grounded studies[TIAB] OR grounded research[TIAB] OR grounded analysis[TIAB] OR grounded analyses[TIAB] OR life story[TIAB] OR life stories[TIAB] OR emic[TIAB] OR etic[TIAB] OR hermeneutics[TIAB] OR heuristic*[TIAB] OR semiotic[TIAB] OR data saturation[TIAB] OR participant observation[TIAB] OR action research[TIAB] OR cooperative inquiry[TIAB] OR co-operative inquiry[TIAB] OR field study[TIAB] OR field studies[TIAB] OR field research[TIAB] OR theoretical sample[TIAB] OR theoretical samples[TIAB] OR theoretical sampling[TIAB] OR purposive sampling[TIAB] OR purposive sample*[TIAB] OR lived experience*[TIAB] OR content analysis[TIAB] OR content analyses[TIAB] OR discourse[TIAB] OR narrative analysis[TIAB] OR narrative analyses[TIAB] OR heidegger*[TIAB] OR colaizzi[TIAB] OR spiegelberg[TIAB] OR van manen*[TIAB] OR van kaam[TIAB] OR merleau ponty[TIAB] OR husserl*[TIAB] OR Foucault[TIAB] OR Corbin[TIAB] OR Strauss[TIAB] OR Glaser[TIAB]) OR mixed model*[TIAB] OR mixed design*[TIAB] OR multiple method*[TIAB] OR multimethod*[TIAB] OR triangulat*[TIAB] |
